# Supplementary material for: A family of one-dimensional lanthanide complexes bridged by two distinct carboxylate ligands with the Dy analogue displaying magnetic relaxation behaviour
Source: Royal Society of Chemistry journal article supplement (doi:10.1039/c7dt02736b), 2017-01-01
Supplement: c7dt02736b2.pdf [file c7dt02736b2.pdf]

## Electronic Supplementary Information (ESI)

### **A family of 1D lanthanide complexes bridged by two distinct carboxylate ligands with the Dy analogue displaying magnetic relaxation behaviour**

Wen-Hua Zhu,<sup>\*a</sup> Xia Xiong,<sup>a</sup> Chen Gao,<sup>b</sup> Shan Li,<sup>a</sup> Yan Zhang,<sup>a</sup> Juan Wang,<sup>a</sup> Chi Zhang,<sup>a</sup> Annie K Powell,<sup>c</sup> and Song Gao<sup>\*b</sup>

<sup>a</sup> *Hubei Collaborative Innovation Center for Advanced Organic Chemical Materials, Ministry-of-Education Key Laboratory for the Synthesis and Application of Organic Functional Molecules, College of Chemistry and Chemical Engineering, Hubei University, Wuhan 430062, PR China.*

<sup>b</sup> *Beijing National Laboratory for Molecular Sciences, State Key Laboratory of Rare Earth Materials Chemistry and Applications, College of Chemistry and Molecular Engineering, Peking University, No. 5 Yiheyuan Road, Beijing 100871, China.*

<sup>c</sup> *Institute of Inorganic Chemistry, Karlsruhe Institute of Technology, Engesserstrasse 15, Karlsruhe 76131, Germany.*

**Table S1** Selected bond lengths (Å) and angles (°) for **3**

|                   |            |                     |            |
|-------------------|------------|---------------------|------------|
| Gd(1)–O(1)        | 2.3167(19) | Gd(1)–O(2)#2        | 2.3518(18) |
| Gd(1)–O(4)        | 2.4820(17) | Gd(1)–O(5)          | 2.4269(19) |
| O(1)–Gd(1)–O(1)#1 | 146.99(10) | O(1)–Gd(1)–O(2)#2   | 81.16(7)   |
| O(1)–Gd(1)–O(2)#3 | 106.73(7)  | O(1)–Gd(1)–O(4)     | 77.69(6)   |
| O(1)–Gd(1)–O(4)#1 | 72.79(7)   | O(1)–Gd(1)–O(5)     | 140.02(7)  |
| O(1)–Gd(1)–O(5)#1 | 72.36(7)   | O(2)#2–Gd(1)–O(2)#3 | 152.70(10) |
| O(2)#2–Gd(1)–O(4) | 78.72(7)   | O(2)#2–Gd(1)–O(4)#1 | 128.21(7)  |
| O(2)#2–Gd(1)–O(5) | 77.84(7)   | O(2)#2–Gd(1)–O(5)#1 | 79.97(7)   |
| O(4)–Gd(1)–O(4)#1 | 52.69(8)   | O(4)–Gd(1)–O(5)     | 129.65(6)  |
| O(4)–Gd(1)–O(5)#1 | 145.42(7)  | O(5)–Gd(1)–O(5)#1   | 70.74(9)   |

Symmetry codes: #1 -x+1, y, -z+3/2, #2 x, -y, z+1/2, #3 -x+1, -y, -z+1

**Table S2** Hydrogen bonding geometry for **3**: lengths (Å) and angles (°)

| D–H···A             | d(D–H)    | d(H···A)  | d(D···A)  | <(DHA) |
|---------------------|-----------|-----------|-----------|--------|
| O(5)–H(5A)···O(4)#5 | 0.944(18) | 1.81(2)   | 2.738(2)  | 167(4) |
| O(5)–H(5B)···O(3)#6 | 0.947(19) | 1.987(19) | 2.667(4)  | 127(2) |
| O(5)–H(5B)···O(3)#7 | 0.947(19) | 2.01(4)   | 2.800(4)  | 140(5) |
| O(6)–H(6A)···O(6)#4 | 0.85      | 2.64      | 3.13(4)   | 118.0  |
| O(6)–H(6B)···O(5)   | 0.85      | 2.30      | 3.134(14) | 166.7  |

Symmetry codes: #1 -x+1, y, -z+3/2, #2 x, -y, z+1/2, #3 -x+1, -y, -z+1, #4 -x+1/2, -y+1/2, -z+2, #5 -x+1, -y, -z+2, #6 x-1/2, y+1/2, z, #7 -x+3/2, y+1/2, -z+3/2

Electronic Supplementary Materials (ESI) for *Daton Transactions*

This journal is © The Royal Society of Chemistry 2017

**Table S3** Selected bond lengths (Å) and angles (°) for **5**

|                   |            |                     |            |
|-------------------|------------|---------------------|------------|
| Dy(1)–O(1)        | 2.287(2)   | Dy(1)–O(2)#2        | 2.3127(18) |
| Dy(1)–O(4)        | 2.4603(19) | Dy(1)–O(5)          | 2.418(2)   |
| O(1)–Dy(1)–O(1)#1 | 147.82(11) | O(1)–Dy(1)–O(2)#2   | 81.96(8)   |
| O(1)–Dy(1)–O(2)#3 | 105.79(7)  | O(1)–Dy(1)–O(4)     | 78.17(7)   |
| O(1)–Dy(1)–O(4)#1 | 73.09(7)   | O(1)–Dy(1)–O(5)     | 139.76(8)  |
| O(1)–Dy(1)–O(5)#1 | 71.88(7)   | O(2)#2–Dy(1)–O(2)#3 | 152.37(12) |
| O(2)#2–Dy(1)–O(4) | 78.57(7)   | O(2)#2–Dy(1)–O(4)#1 | 128.71(8)  |
| O(2)#2–Dy(1)–O(5) | 77.68(8)   | O(2)#2–Dy(1)–O(5)#1 | 79.84(8)   |
| O(4)–Dy(1)–O(4)#1 | 53.12(8)   | O(4)–Dy(1)–O(5)     | 129.79(6)  |
| O(4)–Dy(1)–O(5)#1 | 145.09(7)  | O(5)–Dy(1)–O(5)#1   | 70.60(10)  |

Symmetry codes: #1 -x+1, y, -z+3/2, #2 x, -y, z+1/2, #3 -x+1, -y, -z+1

**Table S4** Hydrogen bonding geometry for **5**: lengths (Å) and angles (°)

| D–H···A             | d(D–H)    | d(H···A)  | d(D···A)  | <(DHA)  |
|---------------------|-----------|-----------|-----------|---------|
| O(5)–H(5A)···O(4)#4 | 0.945(17) | 1.821(18) | 2.764(3)  | 175(4)  |
| O(5)–H(5B)···O(3)#5 | 0.906(18) | 1.943(17) | 2.681(5)  | 137(3)  |
| O(6)–H(6A)···O(5)   | 1.027(15) | 2.074(15) | 3.101(10) | 178(9)  |
| O(6)–H(6B)···O(6)#6 | 0.97(2)   | 2.45(11)  | 3.09(3)   | 123(10) |

Symmetry codes: #1 -x+1, y, -z+3/2, #2 x, -y, z+1/2, #3 -x+1, -y, -z+1, #4 -x+1, -y, -z+2, #5 x-1/2, y+1/2, z, #6 -x+1/2, -y+1/2, -z+2

**Table S5** Continuous shape measures (CShM) for **5** using SHAPE 2.1

|          | <b>5</b> |
|----------|----------|
| OP-8     | 27.572   |
| HPY-8    | 22.288   |
| HBPY-8   | 12.278   |
| CU-8     | 9.305    |
| SAPR-8   | 1.741    |
| TDD-8    | 2.361    |
| JGBF-8   | 11.809   |
| JETBPY-8 | 27.677   |
| JBTPR-8  | 2.467    |
| BTPR-8   | 2.172    |
| JSD-8    | 2.968    |
| TT-8     | 10.163   |
| ETBPY-8  | 24.032   |

OP-8 = ( $D_{8h}$ ) OctagonHPY-8 = ( $C_{7v}$ ) Heptagonal pyramidHBPY-8 = ( $D_{6h}$ ) Hexagonal bipyramidCU-8 = ( $O_h$ ) CubeSAPR-8 = ( $D_{4d}$ ) Square antiprismTDD-8 = ( $D_{2d}$ ) Triangular dodecahedronJGBF-8 = ( $D_{2d}$ ) Johnson gyrobifastigium  
J26JETBPY-8 = ( $D_{3h}$ ) Johnson elongated triangular bipyramid J14JBTPR-8 = ( $C_{2v}$ ) Biaugmented trigonal prism J50BTPR-8 = ( $C_{2v}$ ) Biaugmented trigonal prismJSD-8 = ( $D_{2d}$ ) Snub diphenoid J84TT-8 = ( $T_d$ ) Triakis tetrahedronETBPY-8 = ( $D_{3h}$ ) Elongated trigonal bipyramid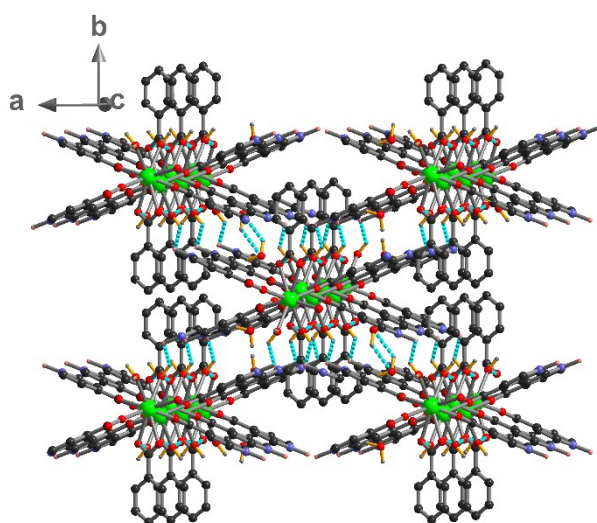**Fig. S1** View of the packing diagram of complex **5** along the *c*-axis.

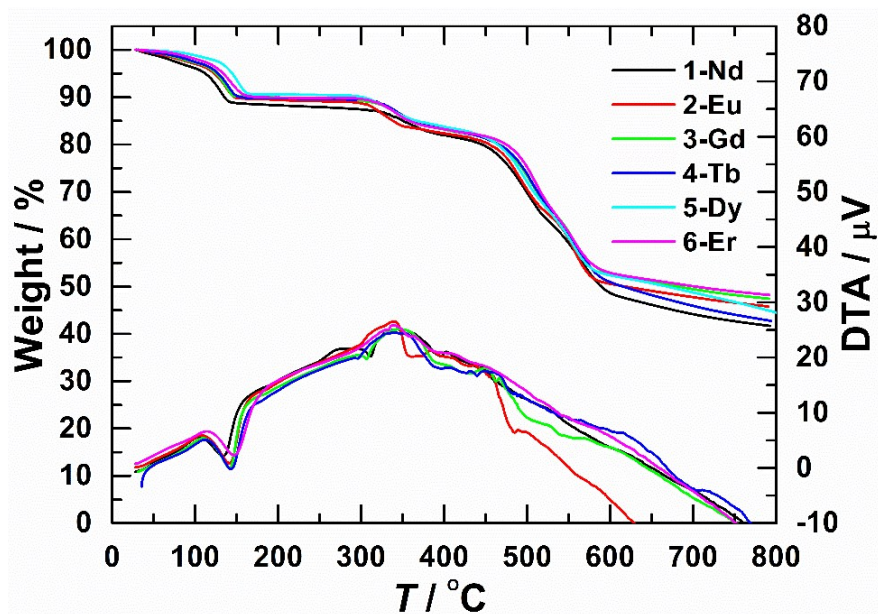

Fig. S2 The TG–DTA curves for complexes 1–6.

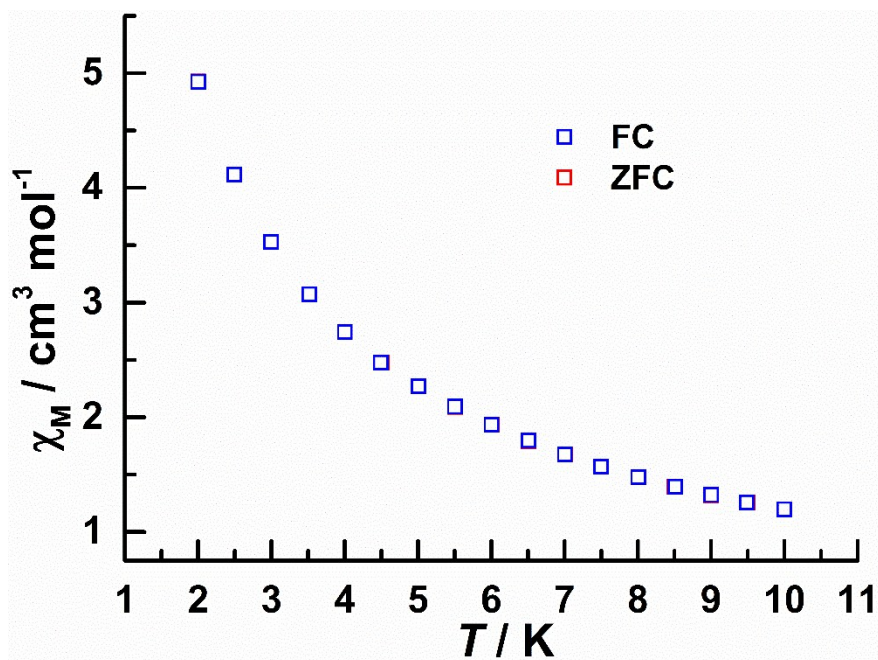

Fig. S3 The zero-field-cooled/field-cooled (ZFC-FC) magnetic susceptibility  $\chi_M$  under a 20 Oe dc field in warm mode for 5.

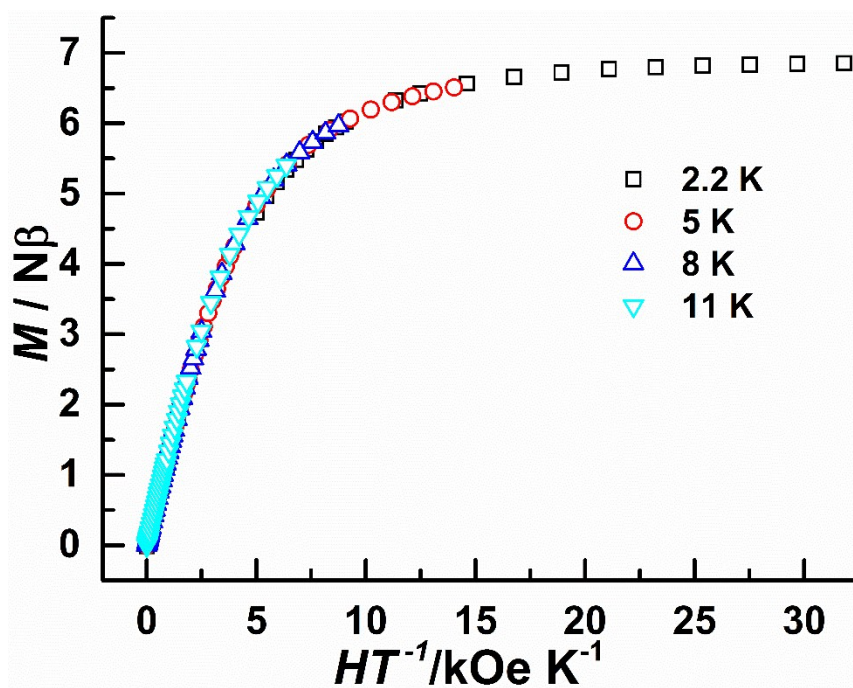

Fig. S4 Field dependence of the magnetization for compound 3 at 2.2, 5, 8, 11 K.

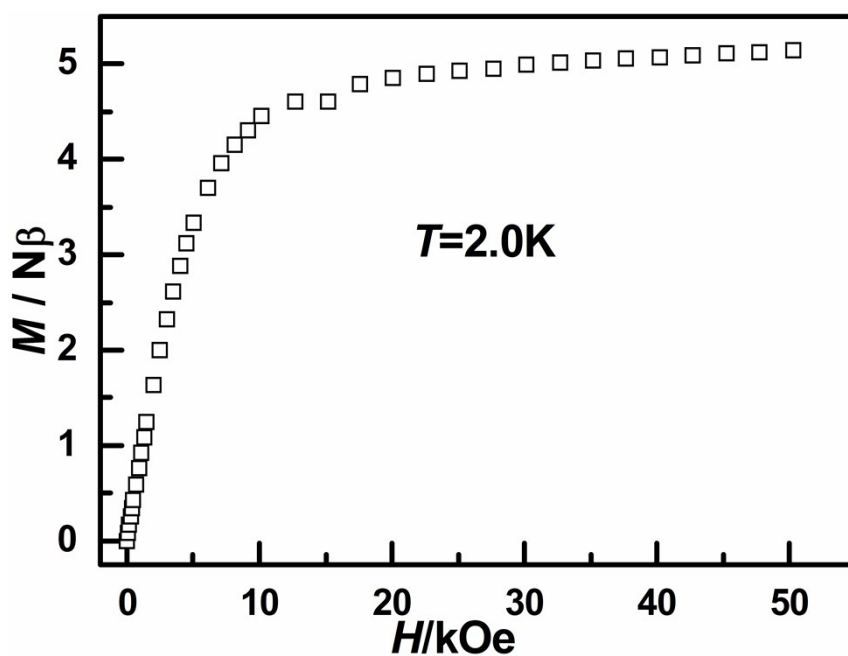

Fig. S5 Field dependence of the magnetization for compound 5 at 2.0 K.



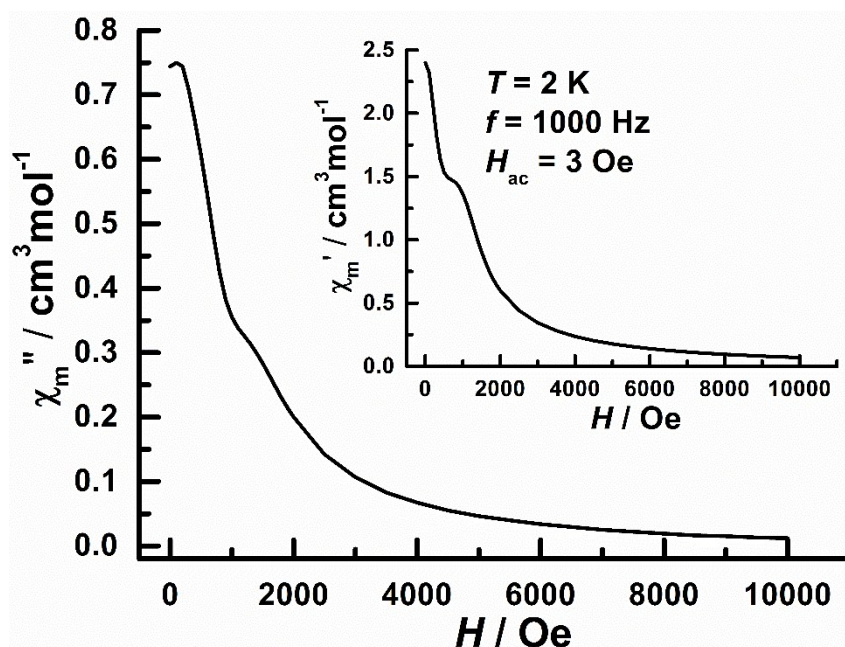

**Fig. S6** Field dependence of the in-phase ( $\chi'$ , inset) and out-of-phase ( $\chi''$ ) ac susceptibilities for **5** with  $f = 1000 \text{ Hz}$ .

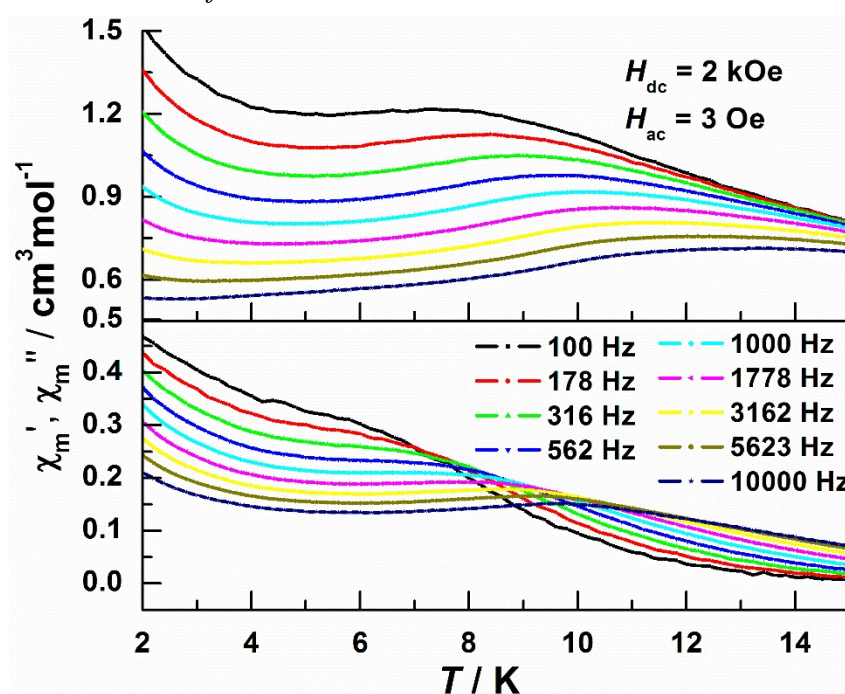

**Fig. S7** Temperature dependence of  $\chi'$  and  $\chi''$  ac susceptibility components under a 2 kOe dc field for **5**.

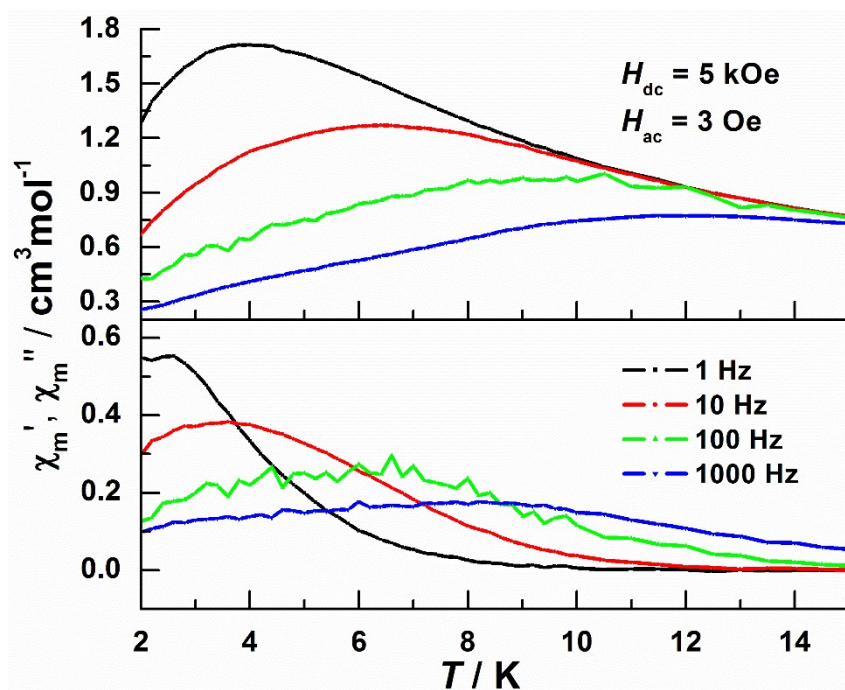

**Fig. S8** Temperature dependence of  $\chi'$  and  $\chi''$  ac susceptibility components under a 5 kOe dc field for **5**.

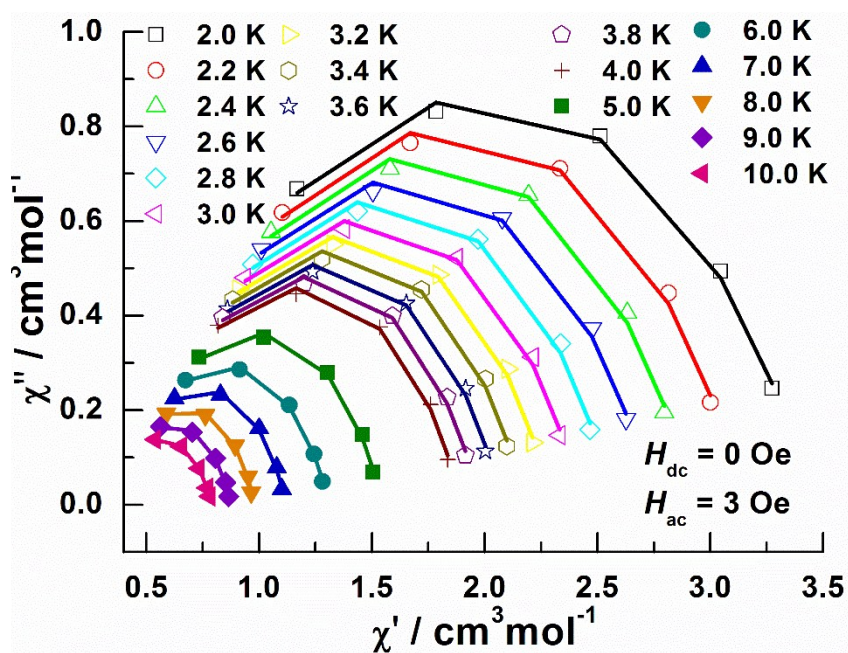

**Fig. S9** The Cole–Cole plots of  $\chi''$  vs.  $\chi'$  at 2.0–4.0 K (0.2 K interval) and 4.0–10.0 K (1.0 K interval) for compound **5** under a 0 Oe dc field. The solid lines are the least-square fitting of the data to a distribution of single relaxation processes.



**Table S6** Relaxation parameters from the best fitting of the Cole–Cole diagrams by the generalized Debye model under a zero dc field for **5**.

| $T(\text{K})$ | $\chi_s(\text{cm}^3 \text{ mol}^{-1})$ | $\chi_T(\text{cm}^3 \text{ mol}^{-1})$ | $\tau(\text{s})$      | $\alpha$ |
|---------------|----------------------------------------|----------------------------------------|-----------------------|----------|
| 2.0           | 0.49                                   | 3.45                                   | $6.48 \times 10^{-5}$ | 0.33     |
| 2.2           | 0.50                                   | 3.15                                   | $6.48 \times 10^{-5}$ | 0.31     |
| 2.4           | 0.50                                   | 2.93                                   | $6.28 \times 10^{-5}$ | 0.31     |
| 2.6           | 0.48                                   | 2.75                                   | $6.18 \times 10^{-5}$ | 0.31     |
| 2.8           | 0.49                                   | 2.57                                   | $5.98 \times 10^{-5}$ | 0.30     |
| 3.0           | 0.48                                   | 2.43                                   | $5.88 \times 10^{-5}$ | 0.30     |
| 3.2           | 0.47                                   | 2.30                                   | $5.68 \times 10^{-5}$ | 0.29     |
| 3.4           | 0.47                                   | 2.18                                   | $5.58 \times 10^{-5}$ | 0.28     |
| 3.6           | 0.46                                   | 2.07                                   | $5.38 \times 10^{-5}$ | 0.28     |
| 3.8           | 0.46                                   | 1.98                                   | $5.28 \times 10^{-5}$ | 0.28     |
| 4.0           | 0.45                                   | 1.89                                   | $5.08 \times 10^{-5}$ | 0.28     |
| 5.0           | 0.43                                   | 1.54                                   | $4.48 \times 10^{-5}$ | 0.26     |
| 6.0           | 0.40                                   | 1.31                                   | $3.78 \times 10^{-5}$ | 0.27     |
| 7.0           | 0.39                                   | 1.12                                   | $3.38 \times 10^{-5}$ | 0.24     |
| 8.0           | 0.38                                   | 0.98                                   | $3.08 \times 10^{-5}$ | 0.24     |
| 9.0           | 0.37                                   | 0.87                                   | $2.68 \times 10^{-5}$ | 0.25     |
| 10.0          | 0.35                                   | 0.79                                   | $2.28 \times 10^{-5}$ | 0.28     |

**Table S7** Relaxation parameters from the best fitting of the Cole–Cole diagrams by the generalized Debye model under 1 kOe dc field for **5**.

| $T(\text{K})$ | $\chi_s(\text{cm}^3 \text{ mol}^{-1})$ | $\chi_T(\text{cm}^3 \text{ mol}^{-1})$ | $\tau(\text{s})$      | $\alpha$ |
|---------------|----------------------------------------|----------------------------------------|-----------------------|----------|
| 5.0           | 0.09                                   | 3.09                                   | $8.88 \times 10^{-4}$ | 0.74     |
| 6.0           | 0.23                                   | 2.34                                   | $2.48 \times 10^{-4}$ | 0.68     |
| 7.0           | 0.34                                   | 1.89                                   | $1.18 \times 10^{-4}$ | 0.61     |
| 8.0           | 0.45                                   | 1.58                                   | $5.98 \times 10^{-5}$ | 0.50     |
| 9.0           | 0.51                                   | 1.38                                   | $3.88 \times 10^{-5}$ | 0.40     |
| 10.0          | 0.56                                   | 1.23                                   | $2.88 \times 10^{-5}$ | 0.31     |
| 11.0          | 0.61                                   | 1.12                                   | $2.38 \times 10^{-5}$ | 0.24     |

**Table S8** Relaxation parameters from the best fitting of the Cole–Cole diagrams by the generalized Debye model under a 2 kOe dc field for **5**.

| $T(\text{K})$ | $\chi_s(\text{cm}^3 \text{ mol}^{-1})$ | $\chi_r(\text{cm}^3 \text{ mol}^{-1})$ | $\tau(\text{s})$      | $\alpha$ |
|---------------|----------------------------------------|----------------------------------------|-----------------------|----------|
| 7.0           | 0.30                                   | 2.24                                   | $2.48 \times 10^{-3}$ | 0.66     |
| 8.0           | 0.34                                   | 1.70                                   | $4.48 \times 10^{-4}$ | 0.61     |
| 9.0           | 0.35                                   | 1.43                                   | $1.58 \times 10^{-4}$ | 0.57     |
| 10.0          | 0.35                                   | 1.28                                   | $5.68 \times 10^{-5}$ | 0.57     |
| 11.0          | 0.41                                   | 1.13                                   | $3.58 \times 10^{-5}$ | 0.41     |
| 12.0          | 0.45                                   | 1.03                                   | $2.28 \times 10^{-5}$ | 0.48     |
